# Supplementary material for: Enhanced solar-to-hydrogen efficiency for photocatalytic water splitting based on a polarized heterostructure: the role of intrinsic dipoles in heterostructures
Source: Royal Society of Chemistry journal article supplement (doi:10.1039/d1ta03137f), 2021-01-01

*Supplementary Information for*

**Enhanced the solar-to-hydrogen efficiency for photocatalytic water  
splitting based on polarized heterostructure: The role of intrinsic dipole  
in heterostructures**

Xinyi Liu,<sup>a</sup> Peng Cheng,<sup>a</sup> Xiuhai Zhang,<sup>b</sup> Tao Shen,<sup>a</sup> Jia Liu,<sup>a</sup> Ji-Chang Ren,<sup>a</sup> Hongqiang  
Wang,<sup>b\*</sup> Shuang Li<sup>a\*</sup> and Wei Liu<sup>a\*</sup>

<sup>a</sup>Nano and Heterogeneous Materials Center, School of Materials Science and  
Engineering, Nanjing University of Science and Technology, Nanjing 210094, China

<sup>b</sup>State Key Laboratory of Solidification Processing, Center for Nano Energy Materials,  
School of Materials Science and Engineering, Northwestern Polytechnical University  
and Shaanxi Joint Laboratory of Graphene, Xi'an 710072, China

\*Email: [lishuang@njust.edu.cn](mailto:lishuang@njust.edu.cn), [hongqiang.wang@nwpu.edu.cn](mailto:hongqiang.wang@nwpu.edu.cn), and

[weiliu@njust.edu.cn](mailto:weiliu@njust.edu.cn)

**Table S1** Calculated lattice parameters  $a_0$  and total heights  $h$ , bond lengths, and band gap  $E_g$  at the PBE level for  $M_2XY$  and  $E_g$  at the HSE level  $M_2X_3$  monolayers. These values agree well with previous reports.<sup>1-4</sup>

| Materials                       | $a_0(\text{\AA})$ | $h(\text{\AA})$ | $d_{M-M}(\text{\AA})$ | $d_{M-Se}(\text{\AA})$ | $d_{M-S}(\text{\AA})$ | $d_{M-Te}(\text{\AA})$ | $E_g$ (eV ) |
|---------------------------------|-------------------|-----------------|-----------------------|------------------------|-----------------------|------------------------|-------------|
| In <sub>2</sub> SSe             | 4.00              | 5.24            | 2.77                  | 2.66                   | 2.58                  | –                      | 1.61        |
| In <sub>2</sub> STe             | 4.15              | 5.32            | 2.77                  | –                      | 2.62                  | 2.83                   | 1.08        |
| In <sub>2</sub> SeTe            | 4.21              | 5.45            | 2.77                  | 2.71                   | –                     | 2.84                   | 1.19        |
| Ga <sub>2</sub> SSe             | 3.72              | 4.72            | 2.46                  | 2.47                   | 2.39                  | –                      | 2.08        |
| Ga <sub>2</sub> STe             | 3.90              | 4.78            | 2.45                  | –                      | 2.45                  | 2.64                   | 0.99        |
| Ga <sub>2</sub> SeTe            | 3.98              | 4.88            | 2.45                  | 2.55                   | –                     | 2.66                   | 1.29        |
| In <sub>2</sub> S <sub>3</sub>  | 3.94              | 6.44            | –                     | –                      | –                     | –                      | 1.94        |
| In <sub>2</sub> Se <sub>3</sub> | 4.11              | 6.82            | –                     | –                      | –                     | –                      | 1.37        |
| In <sub>2</sub> Te <sub>3</sub> | 4.41              | 7.36            | –                     | –                      | –                     | –                      | 1.12        |
| Ga <sub>2</sub> S <sub>3</sub>  | 3.65              | 5.98            | –                     | –                      | –                     | –                      | 2.56        |
| Ga <sub>2</sub> Se <sub>3</sub> | 3.84              | 6.36            | –                     | –                      | –                     | –                      | 1.64        |
| Ga <sub>2</sub> Te <sub>3</sub> | 4.16              | 6.93            | –                     | –                      | –                     | –                      | 0.72        |

**Fig. S1.** The partial charge analysis of the conduction band minimum (CBM) and valence band maximum (VBM) of  $M_2XY$  and  $M_2X_3$  monolayers.

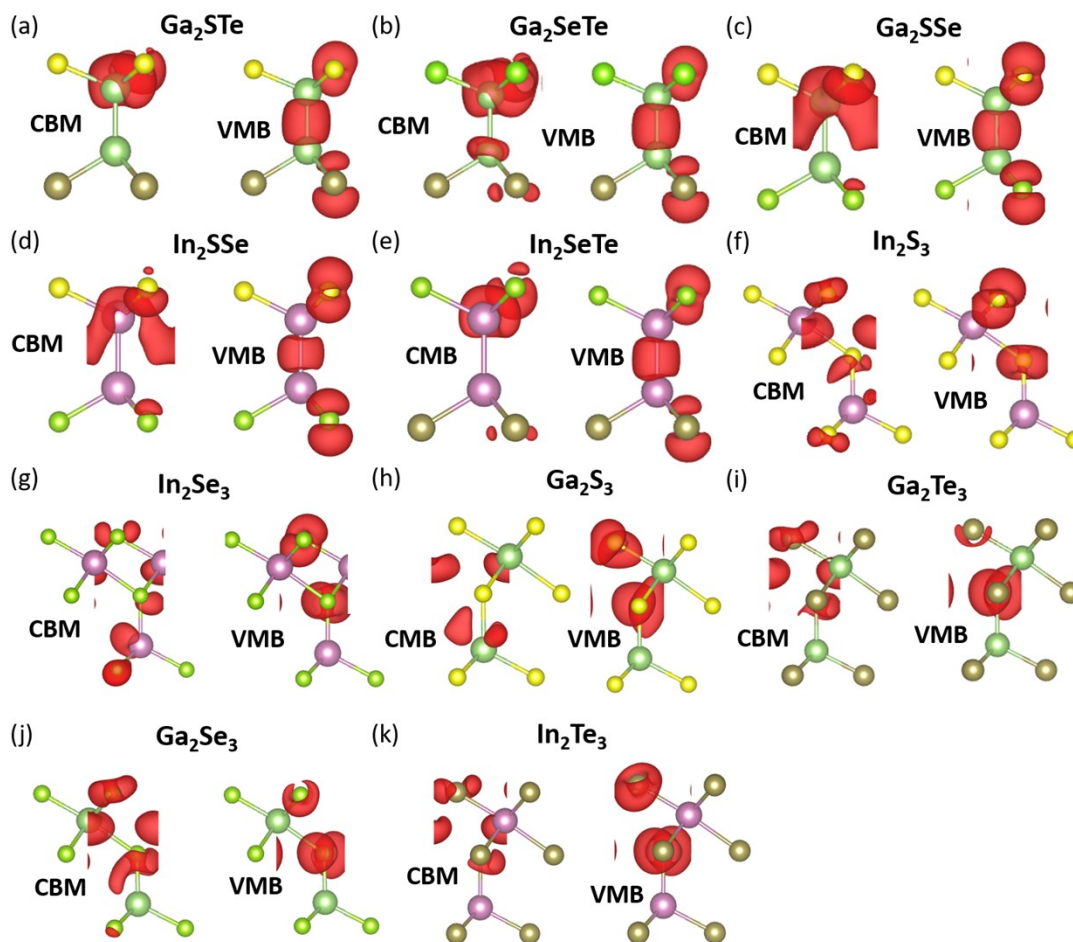

**Fig. S2.** Top and side views of configurations for vertical  $M_2XY$  and  $M_2X_3$  heterostructures with four possible stacking modes.

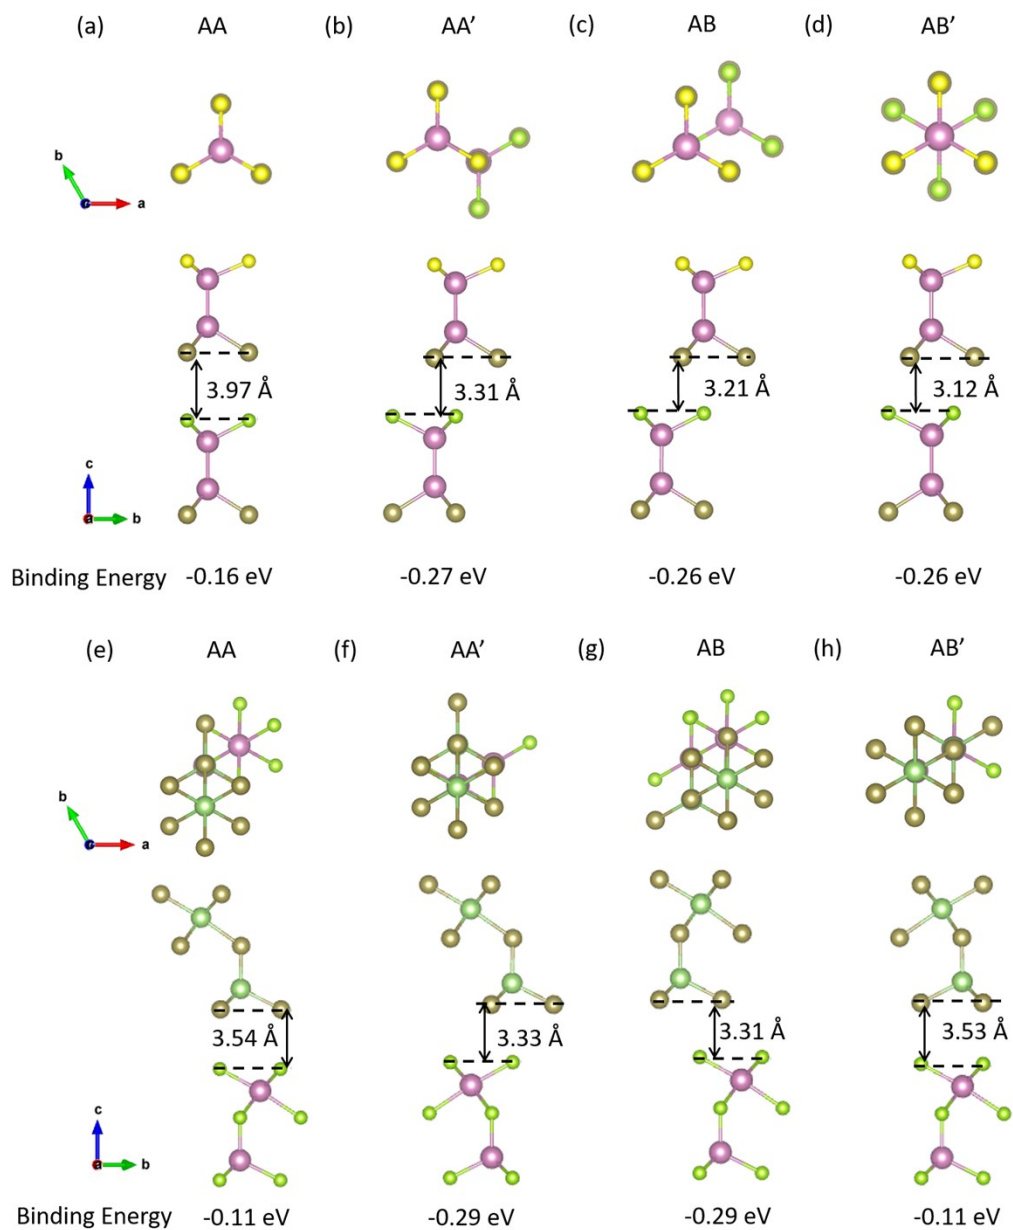

**Table S2** Interlayer distance  $d_l$  and binding energy  $E_b$  of vertical  $M_2XY$  and  $M_2X_3$  heterostructures in different types of stacking. The binding energy is calculated by the following formula:  $E_b=(E_{\text{hetero}} - E_{L1} - E_{L2})$ , where the  $E_{\text{hetero}}$ ,  $E_{L1}$  and  $E_{L2}$  represent the total energy of heterostructures, and the individual component of single  $M_2XY$  and  $M_2X_3$  layers in unit cell, respectively.

| Stacking models                                 | AA        |            | AA'       |            | AB        |            | AB'       |            |
|-------------------------------------------------|-----------|------------|-----------|------------|-----------|------------|-----------|------------|
|                                                 | $d_l$ (Å) | $E_b$ (eV) |
| $\text{Sn}_2\text{Te-SGa}_2\text{Te}$           | 3.85      | -0.17      | 3.17      | -0.25      | 3.24      | -0.24      | 3.18      | -0.25      |
| $\text{SGa}_2\text{Te-Sn}_2\text{Te}$           | 3.89      | -0.16      | 3.11      | -0.25      | 3.24      | -0.24      | 3.16      | -0.25      |
| $\text{Sn}_2\text{Te-SeIn}_2\text{Te}$          | 3.97      | -0.16      | 3.11      | -0.27      | 3.21      | -0.26      | 3.12      | -0.26      |
| $\text{SeIn}_2\text{Te-Sn}_2\text{Te}$          | 3.92      | -0.16      | 3.27      | -0.27      | 3.26      | -0.27      | 3.10      | -0.28      |
| $\text{In}_2\text{Te}_3\text{-Ga}_2\text{Te}_3$ | 3.58      | -0.12      | 3.35      | -0.29      | 3.33      | -0.28      | 3.58      | -0.13      |
| $\text{Ga}_2\text{Te}_3\text{-In}_2\text{Te}_3$ | 3.57      | -0.11      | 3.33      | -0.29      | 3.37      | -0.28      | 3.57      | -0.11      |
| $\text{In}_2\text{Se}_3\text{-In}_2\text{Te}_3$ | 3.53      | -0.10      | 3.43      | -0.28      | 3.43      | -0.28      | 3.56      | -0.11      |
| $\text{In}_2\text{Te}_3\text{-In}_2\text{Se}_3$ | 3.51      | -0.09      | 3.43      | -0.28      | 3.39      | -0.27      | 3.56      | -0.11      |
| $\text{Ga}_2\text{Te}_3\text{-In}_2\text{Se}_3$ | 3.54      | -0.11      | 3.33      | -0.29      | 3.31      | -0.29      | 3.53      | -0.11      |
| $\text{In}_2\text{Se}_3\text{-Ga}_2\text{Te}_3$ | 3.54      | -0.13      | 3.32      | -0.32      | 3.29      | -0.31      | 3.53      | -0.12      |

**Table S3** T The charge transfer  $Q$  and internal electric field  $E_{in}$  of vertical  $M_2XY$  and  $M_2X_3$  heterostructures in different types of stacking.

|               | $Sn_2Te-SGa_2Te$    | $SGa_2Te-Sn_2Te$    | $Sn_2Te-SeIn_2Te$   | $SeIn_2Te-Sn_2Te$   | $In_2Te_3-Ga_2Te_3$ |
|---------------|---------------------|---------------------|---------------------|---------------------|---------------------|
| $Q$ (e)       | 0.017               | 0.016               | 0.017               | 0.015               | 0.014               |
| $E_{in}$ (eV) | 0.52                | 0.32                | 0.45                | 0.36                | 0.37                |
|               | $Ga_2Te_3-In_2Te_3$ | $In_2Se_3-In_2Te_3$ | $In_2Te_3-In_2Se_3$ | $Ga_2Te_3-In_2Se_3$ | $In_2Se_3-Ga_2Te_3$ |
| $Q$ (e)       | 0.016               | 0.012               | 0.023               | 0.025               | 0.012               |
| $E_{in}$ (eV) | 0.37                | 0.025               | 0.58                | 0.65                | 0.039               |

**Table S4** The work functions WF (eV) for up and down surfaces of  $M_2XY$ ,  $M_2X_3$  and InS monolayers.

| Surface | In <sub>2</sub> STe | In <sub>2</sub> SeTe | Ga <sub>2</sub> STe | In <sub>2</sub> Se <sub>3</sub> | In <sub>2</sub> Te <sub>3</sub> | Ga <sub>2</sub> Te <sub>3</sub> | InS  |
|---------|---------------------|----------------------|---------------------|---------------------------------|---------------------------------|---------------------------------|------|
| up      | 6.02                | 4.88                 | 5.72                | 6.24                            | 5.28                            | 5.32                            | 6.22 |
| down    | 4.64                | 4.46                 | 4.96                | 5.02                            | 4.22                            | 4.43                            | 6.22 |

**Fig. S3.** The band alignments of the type-II junction mode for heterostructures  $\text{Sn}_2\text{Te}$ - $\text{SeIn}_2\text{Te}$  (a) and  $\text{In}_2\text{Se}_3$ - $\text{Ga}_2\text{Te}_3$  (b), respectively. The black arrows represent the charge transfer and e-h recombination process. The plane-average charge density difference  $\Delta\rho$  for heterostructures  $\text{Sn}_2\text{Te}$ - $\text{SeIn}_2\text{Te}$  (c) and  $\text{In}_2\text{Se}_3$ - $\text{Ga}_2\text{Te}_3$  (d). The positive and negative value in  $\Delta\rho$  indicate electron accumulation and depletion, respectively. The red (green) colour corresponds to the charge accumulation (depletion). The  $E_{\text{in}}$  represents the built-in electric field at the interface of heterostructures.

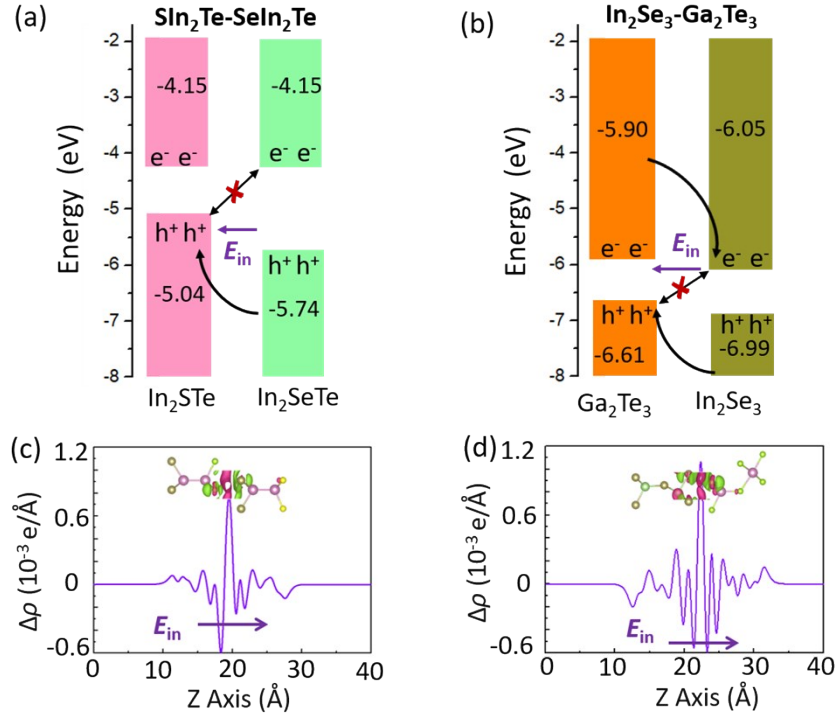



**Fig. S4.** (a) Plane-average charge density difference  $\Delta\rho$  of  $\text{In}_2\text{Se}_3/\text{SnP}_3$  heterostructure. The positive and negative value in  $\Delta\rho$  indicate electron accumulation and depletion, respectively. The red (green) colour corresponds to the charge accumulation (depletion). (b) The schematic plot of vacuum level for  $\text{In}_2\text{Se}_3/\text{SnP}_3$  heterostructure. It is noted that there is a big difference  $\Delta\Phi$  for the vacuum level between the  $\text{SnP}_3$  surface and  $\text{In}_2\text{Se}_3$  surface (larger than the intrinsic  $\Delta\Phi$  for  $\text{In}_2\text{Se}_3$  layer), which means that there is an internal electric field pointing to  $\text{In}_2\text{Se}_3$  layer from  $\text{SnP}_3$  layer at the interface of the heterostructure.

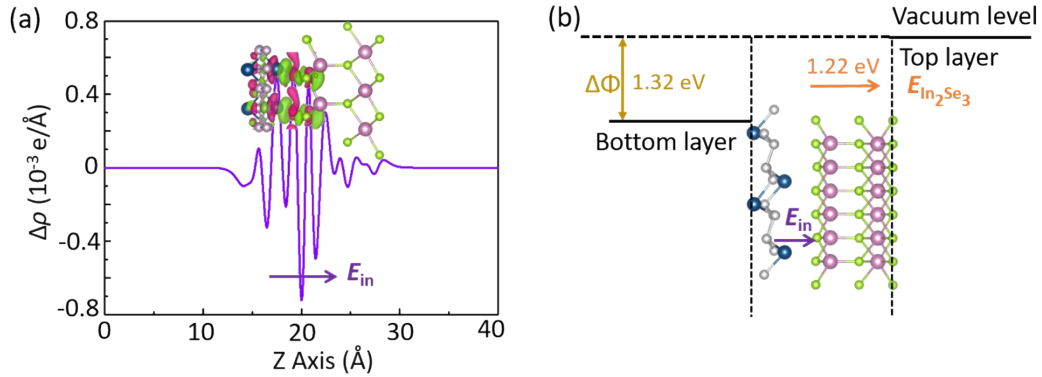

Supplement: d1ta03137f1.pdf [file d1ta03137f1.pdf]
